# Supplementary material for: Exploring Enzymatic Hydrolysis of Urine Samples for Investigation of Drugs Associated with Drug-Facilitated Sexual Assault
Source: MDPI journal article supplement (doi:10.3390/ph17010013), 2023-12-21
Supplement: s1 [file s1]

**Supplementary Table S1** Retention time (RT), MRM transitions, collision energies, internal standards (IS) and ionization mode for the 11 glucuronides and their parent drug.

| Analyte                     | RT (min) | MRM 1 (m/z) | CE 1 (eV) | MRM 2 (m/z) | CE 2 (eV) | Internal standard | MRM 1 (m/z) | Ionization mode |
|-----------------------------|----------|-------------|-----------|-------------|-----------|-------------------|-------------|-----------------|
| Amitriptyline               | 7.67     | 278 > 233   | 16        | 278 > 91    | 24        | Amitriptyline-d6  | 284 > 91    | ESI+            |
| Amitriptyline glucuronide   | 7.39     | 454 > 233   | 18        | 454 > 105   | 32        | Amitriptyline-d6  | 284 > 91    | ESI+            |
| Buprenorphine               | 7.26     | 468 > 84    | 40        | 468 > 55    | 40        | Amitriptyline-d6  | 284 > 91    | ESI+            |
| Buprenorphin glucuconide    | 6.39     | 644 > 468   | 42        | 644 > 414   | 50        | Amitriptyline-d6  | 284 > 91    | ESI+            |
| Codeine                     | 3.52     | 300 > 165   | 48        | 300 > 215   | 24        | Codeine-d6        | 306 > 218   | ESI+            |
| Codeine-6-glucuronide       | 3.32     | 476 > 300   | 28        | 476 > 282   | 22        | Codeine-d6        | 306 > 218   | ESI+            |
| Diphenhydramine             | 6.98     | 256 > 167   | 12        | 256 > 152   | 36        | Amitriptyline-d6  | 284 > 91    | ESI+            |
| Diphenhydramine glucuronide | 6.82     | 432 > 256   | 20        | 432 > 167   | 24        | Amitriptyline-d6  | 284 > 91    | ESI+            |
| Doxylamine                  | 4.67     | 271 > 182   | 20        | 271 > 167   | 38        | Morphine-d6       | 292 > 201   | ESI+            |
| Doxylamine glucuronide      | 4.15     | 447 > 226   | 16        | 447 > 182   | 30        | Morphine-d6       | 292 > 201   | ESI+            |
| Lorazepam                   | 7.94     | 323 > 231   | 29        | 323 > 229   | 29        | Amitriptyline-d6  | 284 > 91    | ESI+            |
| Lorazepam glucuronide       | 7.31     | 496 > 320   | 12        | 496 > 274   | 36        | Amitriptyline-d6  | 284 > 91    | ESI+            |
| Morphine                    | 2.31     | 286 > 201   | 24        | 286 > 165   | 38        | Morphine-d6       | 292 > 201   | ESI+            |
| Morphine-3-glucuronide      | 1.82     | 462 > 285   | 26        | 462 > 152   | 74        | Morphine-d6       | 292 > 201   | ESI+            |
| Morphine-6-glucuronid       | 2.31     | 462 > 286   | 30        | 462 > 201   | 40        | Morphine-d6       | 292 > 201   | ESI+            |
| Oxymorphone                 | 3.49     | 302 > 227   | 28        | 302 > 198   | 42        | Morphine-d6       | 292 > 201   | ESI+            |
| Oxymorphone-3-glucuronide   | 1.81     | 478 > 284   | 24        | 478 > 227   | 42        | Morphine-d6       | 292 > 201   | ESI+            |
| Scopolamin                  | 3.87     | 304 > 138   | 20        | 304 > 156   | 14        | Morphine-d6       | 292 > 201   | ESI+            |
| Scopolamine glucuronide     | 3.71     | 478 > 175   | 18        | 478 > 113   | 22        | Morphine-d6       | 292 > 201   | ESI+            |
| Temazepam                   | 8.23     | 301 > 177   | 36        | 301 > 255   | 22        | Temazepam-d5      | 306 > 260   | ESI+            |
| Temazepam glucuronide       | 7.51     | 477 > 301   | 15        | 477 > 283   | 25        | Temazepam-d5      | 306 > 260   | ESI+            |

**Supplementary Table S2** Retention time (RT), MRM transitions, collision energies, internal standards (IS) and ionization mode for the 141 drugs and metabolites included in the stability experiment.

| Analyte                             | RT (min) | MRM 1 (m/z) | CE 1 (eV) | MRM 2 (m/z) | CE 2 (eV) | Ionization mode |
|-------------------------------------|----------|-------------|-----------|-------------|-----------|-----------------|
| 10,11-Dihydro-10-hydroxycarbazepine | 6.55     | 255 > 237   | 8         | 255 > 194   | 18        | ESI+            |
| 6-MAM                               | 4.01     | 328 > 165   | 26        | 328 > 211   | 34        | ESI+            |
| 7-Aminoclonazepam                   | 5.06     | 286 > 222   | 24        | 286 > 121   | 30        | ESI+            |
| 7-Aminoflunitrazepam                | 5.86     | 284 > 135   | 26        | 284 > 227   | 25        | ESI+            |
| 7-Aminonitrazepam                   | 3.53     | 252 > 121   | 20        | 252 > 94    | 36        | ESI+            |
| 9-Hydroxyrisperidone                | 6.23     | 427 > 207   | 27        | 427 > 110   | 49        | ESI+            |
| Acepromazine                        | 2.04     | 129 > 75    | 26        | 129 > 93    | 16        | ESI+            |
| Alpha-hydroxyalprazolam             | 7.83     | 325 > 243   | 26        | 325 > 279   | 34        | ESI+            |
| Alpha-hydroxymidazolam              | 7.12     | 342 > 16    | 42        |             |           | ESI+            |
| Alprazolam                          | 8.10     | 309 > 281   | 24        | 309 > 205   | 38        | ESI+            |
| Amphetamine                         | 3.82     | 136 > 119   | 6         | 136 > 91    | 14        | ESI+            |
| Amisulpride                         | 4.59     | 370 > 242   | 26        | 370 > 196   | 38        | ESI+            |
| Amitriptyline                       | 7.67     | 278 > 233   | 16        | 278 > 91    | 24        | ESI+            |
| Amitriptyline glucuronide           | 7.39     | 454 > 233   | 18        | 454 > 105   | 32        | ESI+            |
| Amlodipine                          | 7.67     | 409 > 238   | 11        | 409 > 294   | 13        | ESI+            |
| Aripiprazole                        | 7.60     | 448 > 285   | 26        | 448 > 176   | 31        | ESI+            |
| Atropine                            | 4.73     | 290 > 124   | 25        | 290 > 103   | 50        | ESI+            |
| Baclofen                            | 4.05     | 214 > 116   | 29        | 214 > 151   | 18        | ESI+            |
| Benzoylecgonine                     | 5.01     | 290 > 105   | 30        | 290 > 168   | 18        | ESI+            |
| Bromazepam                          | 7.27     | 318 > 182   | 30        | 318 > 209   | 25        | ESI+            |
| Buprenorphine                       | 7.26     | 468 > 84    | 40        | 468 > 55    | 40        | ESI+            |
| Buprenorphine glucuronide           | 6.39     | 644 > 468   | 42        | 644 > 414   | 50        | ESI+            |
| Carbamazepine                       | 7.59     | 237 > 194   | 18        | 237 > 179   | 34        | ESI+            |
| Carbamazepine-10,11-epoxide         | 6.86     | 253 > 180   | 24        | 253 > 210   | 14        | ESI+            |
| Carisoprodol                        | 7.91     | 261 > 55    | 28        | 261 > 176   | 10        | ESI+            |
| Cathine                             | 3.03     | 152 > 134   | 8         | 152 > 117   | 16        | ESI+            |
| Cathinone                           | 3.10     | 150 > 117   | 18        | 150 > 105   | 16        | ESI+            |
| Cetirizine                          | 7.80     | 389 > 201   | 19        | 389 > 166   | 63        | ESI+            |
| Chlordiazepoxide                    | 5.03     | 300 > 227   | 24        | 300 > 283   | 23        | ESI+            |
| Chlorpheniramine                    | 6.41     | 275 > 230   | 16        | 275 > 167   | 36        | ESI+            |
| Chlorprothixene                     | 7.98     | 316 > 231   | 28        | 316 > 271   | 18        | ESI+            |
| Cinnarizine                         | 8.24     | 369 > 167   | 19        | 369 > 152   | 53        | ESI+            |
| Citalopram                          | 7.02     | 325 > 109   | 26        | 325 > 262   | 18        | ESI+            |

| Analyte                     | RT (min) | MRM 1 (m/z) | CE 1 (eV) | MRM 2 (m/z) | CE 2 (eV) | Ionization mode |
|-----------------------------|----------|-------------|-----------|-------------|-----------|-----------------|
| Clemastine                  | 8.21     | 344 > 215   | 18        | 344 > 130   | 10        | ESI+            |
| Clobazam                    | 8.17     | 301 > 224   | 32        | 301 > 259   | 20        | ESI+            |
| Clomipramine                | 8.01     | 315 > 86    | 18        | 315 > 58    | 32        | ESI+            |
| Clonazepam                  | 7.76     | 316 > 270   | 24        | 316 > 214   | 35        | ESI+            |
| Clozapine                   | 6.83     | 327 > 270   | 22        | 327 > 192   | 40        | ESI+            |
| Cocaine                     | 5.80     | 304 > 82    | 26        | 304 > 182   | 18        | ESI+            |
| Codeine                     | 3.52     | 300 > 165   | 48        | 300 > 215   | 24        | ESI+            |
| Codeine-6-glucuronide       | 3.32     | 476 > 300   | 28        | 476 > 282   | 22        | ESI+            |
| Cyclizine                   | 7.07     | 267 > 167   | 15        | 267 > 152   | 39        | ESI+            |
| Demoxepam                   | 7.45     | 287 > 179   | 20        | 287 > 105   | 20        | ESI+            |
| Dextromethorphan            | 6.95     | 272 > 171   | 38        | 272 > 215   | 22        | ESI+            |
| Dextropropoxyphene          | 7.62     | 340 > 58    | 14        | 340 > 266   | 12        | ESI+            |
| Diazepam                    | 8.61     | 285 > 154   | 26        | 285 > 193   | 30        | ESI+            |
| Dihydrocodeine              | 3.49     | 302 > 199   | 30        | 302 > 227   | 25        | ESI+            |
| Diphenhydramine             | 6.98     | 256 > 167   | 12        | 256 > 152   | 36        | ESI+            |
| Diphenhydramine glucuronide | 6.82     | 432 > 256   | 20        | 432 > 167   | 24        | ESI+            |
| Doxylamine                  | 4.67     | 271 > 182   | 20        | 271 > 167   | 38        | ESI+            |
| Doxylamine glucuronide      | 4.15     | 447 > 226   | 16        | 447 > 182   | 30        | ESI+            |
| Fenazepam                   | 8.40     | 350 > 206   | 36        | 348 > 183   | 30        | ESI+            |
| Fentanyl                    | 6.90     | 337 > 188   | 23        | 337 > 105   | 41        | ESI+            |
| Fexofenadine                | 7.63     | 502 > 466   | 27        | 502 > 171   | 37        | ESI+            |
| Flunitrazepam               | 7.95     | 314 > 239   | 34        | 314 > 268   | 25        | ESI+            |
| Fluoxetine                  | 7.74     | 310 > 44    | 14        | 310 > 148   | 9         | ESI+            |
| Flupentixol                 | 8.36     | 435 > 265   | 14        | 435 > 100   | 9         | ESI+            |
| Gabapentin                  | 3.65     | 172 > 154   | 16        | 172 > 137   | 10        | ESI+            |
| GHB                         | 1.35     | 103 > 57    | 20        | 103 > 85    | 8         | ESI-            |
| Haloperidol                 | 7.21     | 376 > 165   | 24        | 376 > 123   | 36        | ESI+            |
| Hydrocodone                 | 3.52     | 300 > 199   | 28        | 300 > 171   | 38        | ESI+            |
| Hydromorphone               | 2.75     | 286 > 185   | 28        | 286 > 157   | 39        | ESI+            |
| Hydroxizine                 | 7.61     | 375 > 201   | 20        | 375 > 166   | 60        | ESI+            |
| Imipramine                  | 7.56     | 281 > 86    | 10        | 281 > 208   | 25        | ESI+            |
| Ketamine                    | 5.06     | 238 > 125   | 24        | 238 > 179   | 15        | ESI+            |
| Ketobemidone                | 4.49     | 248 > 190   | 28        | 248 > 70    | 32        | ESI+            |
| Lamotrigine                 | 5.26     | 256 > 210   | 25        | 256 > 171   | 35        | ESI+            |
| Levetiracetam               | 3.51     | 171 > 126   | 12        | 171 > 69    | 26        | ESI+            |
| Levomepromazine             | 7.70     | 329 > 100   | 18        | 329 > 242   | 22        | ESI+            |

| Analyte                   | RT (min) | MRM 1 (m/z) | CE 1 (eV) | MRM 2 (m/z) | CE 2 (eV) | Ionization mode |
|---------------------------|----------|-------------|-----------|-------------|-----------|-----------------|
| Lorazepam                 | 7.94     | 323 > 231   | 29        | 323 > 229   | 29        | ESI+            |
| Lorazepam glucuronide     | 7.31     | 496 > 320   | 12        | 496 > 274   | 36        | ESI+            |
| Lormetazepam              | 8.36     | 335 > 289   | 21        | 335 > 177   | 42        | ESI+            |
| MDA                       | 4.01     | 180 > 163   | 8         | 180 > 105   | 20        | ESI+            |
| MDMA                      | 4.22     | 194 > 105   | 20        | 194 > 163   | 12        | ESI+            |
| Meclozine                 | 8.51     | 391 > 201   | 21        | 391 > 165   | 43        | ESI+            |
| Melatonin                 | 6.26     | 233 > 174   | 15        | 233 > 159   | 27        | ESI+            |
| Meprobamate               | 6.48     | 219 > 158   | 8         | 219 > 97    | 24        | ESI+            |
| Metamphetamine            | 4.09     | 150 > 119   | 10        | 150 > 91    | 18        | ESI+            |
| Methadone                 | 7.74     | 310 > 105   | 26        | 310 > 265   | 14        | ESI+            |
| Methylphenidate           | 5.62     | 234 > 84    | 19        | 234 > 56    | 36        | ESI+            |
| Metoclopramide            | 5.03     | 300 > 227   | 16        | 300 > 184   | 28        | ESI+            |
| Metoprolol                | 5.63     | 268 > 116   | 14        | 268 > 74    | 16        | ESI+            |
| Mianserin                 | 6.98     | 265 > 58    | 20        | 265 > 208   | 20        | ESI+            |
| Midazolam                 | 7.01     | 326 > 291   | 26        | 326 > 223   | 36        | ESI+            |
| Mirtazapine               | 5.47     | 266 > 195   | 26        | 266 > 72    | 18        | ESI+            |
| Morphine                  | 2.31     | 286 > 201   | 24        | 286 > 165   | 38        | ESI+            |
| Morphine-3-glucuronide    | 1.82     | 462 > 285   | 26        | 462 > 152   | 74        | ESI+            |
| Morphine-6-glucuronide    | 1.82     | 462 > 286   | 30        | 462 > 201   | 40        | ESI+            |
| N-Demethylclozapine       | 6.60     | 313 > 192   | 41        | 313 > 270   | 25        | ESI+            |
| N-Demethyldiazepam        | 8.20     | 271 > 140   | 28        | 271 > 165   | 28        | ESI+            |
| Nitrazepam                | 7.67     | 282 > 236   | 22        | 282 > 180   | 35        | ESI+            |
| Norbuprenorphine          | 6.80     | 414 > 83    | 36        | 414 > 101   | 44        | ESI+            |
| Norclobazam               | 7.77     | 287 > 245   | 22        | 287 > 210   | 32        | ESI+            |
| Norfentanyl               | 5.11     | 233 > 84    | 16        | 233 > 150   | 16        | ESI+            |
| Norfluoxetine             | 4.73     | 296 > 134   | 4         | 296 > 296   | 2         | ESI+            |
| Norketamine               | 4.94     | 224 > 125   | 24        | 224 > 207   | 13        | ESI+            |
| Nortriptyline             | 7.67     | 264 > 233   | 12        | 264 > 91    | 14        | ESI+            |
| O-Desmethyltramadol       | 4.21     | 250 > 58    | 12        | 250 > 232   | 13        | ESI+            |
| O-Desmethylvenlafaxine    | 5.10     | 264 > 107   | 31        | 264 > 133   | 24        | ESI+            |
| Olanzapine                | 3.87     | 313 > 256   | 22        | 313 > 84    | 22        | ESI+            |
| Ondansetron               | 5.99     | 294 > 170   | 26        | 294 > 184   | 26        | ESI+            |
| Oxazepam                  | 7.87     | 287 > 241   | 32        | 287 > 104   | 22        | ESI+            |
| Oxazepam glucuronide      | 6.98     | 463 > 287   | 20        | 463 > 269   | 25        | ESI+            |
| Oxcarbazepine             | 7.06     | 253 > 208   | 20        | 253 > 180   | 28        | ESI+            |
| Oxycodone                 | 3.83     | 316 > 241   | 30        | 316 > 298   | 18        | ESI+            |
| Oxymorphone               | 3.49     | 302 > 227   | 28        | 302 > 198   | 42        | ESI+            |
| Oxymorphone-3-glucuronide | 1.81     | 478 > 284   | 24        | 478 > 227   | 42        | ESI+            |

| Analyte                 | RT (min) | MRM 1 (m/z) | CE 1 (eV) | MRM 2 (m/z) | CE 2 (eV) | Ionization mode |
|-------------------------|----------|-------------|-----------|-------------|-----------|-----------------|
| Paroxetine              | 7.38     | 330 > 192   | 24        | 330 > 70    | 28        | ESI+            |
| Pentobarbital           | 7.54     | 225 > 182   | 14        | 225 > 42    | 20        | ESI-            |
| Perphenazine            | 8.02     | 404 > 171   | 22        | 404 > 143   | 28        | ESI+            |
| Pethidine               | 6.03     | 248 > 220   | 20        | 248 > 174   | 16        | ESI+            |
| Phenobarbital           | 6.53     | 231 > 188   | 10        | 231 > 42    | 14        | ESI-            |
| Phenytoin               | 7.41     | 253 > 182   | 16        | 253 > 104   | 30        | ESI+            |
| Pregabalin              | 3.59     | 160 > 55    | 18        | 160 > 97    | 12        | ESI+            |
| Primidone               | 5.45     | 219 > 91    | 28        | 219 > 162   | 12        | ESI+            |
| Promethazine            | 7.34     | 285 > 198   | 24        | 285 > 240   | 15        | ESI+            |
| Propranolol             | 6.80     | 260 > 116   | 17        | 260 > 56    | 29        | ESI+            |
| Quetiapine              | 7.02     | 384 > 221   | 38        | 384 > 253   | 22        | ESI+            |
| Reboxetine              | 7.25     | 314 > 176   | 11        | 314 > 91    | 31        | ESI+            |
| Risperidone             | 6.47     | 411 > 82    | 26        | 411 > 191   | 58        | ESI+            |
| Scopolamine             | 3.87     | 304 > 138   | 20        | 304 > 156   | 14        | ESI+            |
| Scopolamine glucuronide | 3.71     | 478 > 175   | 18        | 478 > 113   | 22        | ESI-            |
| Sertraline              | 7.91     | 306 > 158   | 12        | 308 > 277   | 24        | ESI+            |
| Sulpirid                | 3.15     | 342 > 214   | 32        | 342 > 112   | 24        | ESI+            |
| Suvorexant              | 9.46     | 450 > 186   | 22        | 450 > 104   | 62        | ESI+            |
| Tapentadol              | 5.74     | 222 > 121   | 20        | 222 > 107   | 24        | ESI+            |
| Temazepam               | 8.23     | 301 > 177   | 36        | 301 > 255   | 22        | ESI+            |
| Temazepam glucuronide   | 7.51     | 477 > 301   | 15        | 477 > 283   | 25        | ESI+            |
| Thiopental              | 8.09     | 241 > 57    | 16        | 241 > 100   | 14        | ESI-            |
| Topiramate              | 6.99     | 340 > 264   | 6         | 340 > 184   | 12        | ESI+            |
| Tramadol                | 5.60     | 264 > 58    | 12        | 264 > 246   | 10        | ESI+            |
| Trazodone               | 6.51     | 372 > 148   | 35        | 372 > 176   | 25        | ESI+            |
| Triazolam               | 8.12     | 343 > 308   | 24        | 343 > 239   | 40        | ESI+            |
| Venlafaxine             | 6.59     | 278 > 121   | 28        | 278 > 91    | 40        | ESI+            |
| Zaleplon                | 7.50     | 306 > 236   | 26        | 306 > 264   | 20        | ESI+            |
| Ziprasidone             | 6.92     | 413 > 159   | 40        | 413 > 194   | 26        | ESI+            |
| Zolpidem                | 6.29     | 308 > 235   | 36        | 308 > 92    | 52        | ESI+            |
| Zonisamide              | 5.16     | 213 > 132   | 14        | 213 > 76    | 28        | ESI+            |
| Zopiclone               | 5.36     | 389 > 245   | 16        | 389 > 217   | 34        | ESI+            |
| Zuclopenthixol          | 8.14     | 401 > 231   | 41        | 401 > 128   | 25        | ESI+            |

**Supplementary Table S3** Analyte recovery (%) for the 11 glucuronides and their parent drug after incubation with each enzyme at 20°C for the five incubation periods.

| ANALYTE                     | 20°C  |        |        |      |      |       |        |        |      |      |       |        |        |      |      |
|-----------------------------|-------|--------|--------|------|------|-------|--------|--------|------|------|-------|--------|--------|------|------|
|                             | MIX   |        |        |      |      | B-One |        |        |      |      | BGT   |        |        |      |      |
|                             | 5 min | 10 min | 60 min | 18 h | 24 h | 5 min | 10 min | 60 min | 18 h | 24 h | 5 min | 10 min | 60 min | 18 h | 24 h |
| AMITRIPTYLINE               | 1     | 1      | 1      | 6    | 8    | 98    | 99     | 100    | 100  | 98   | 28    | 72     | 83     | 80   | 84   |
| AMITRIPTYLINE GLUCURONIDE   | 55    | 52     | 51     | 47   | 44   | 1     | 1      | 1      | 0    | 0    | 59    | 8      | 0      | 0    | 0    |
| BUPRENORPHINE               | 5     | 8      | 27     | 43   | 43   | 60    | 61     | 57     | 65   | 56   | 42    | 72     | 72     | 79   | 75   |
| BUPRENORPHINE GLUCUCONIDE   | 38    | 38     | 16     | 0    | 0    | 0     | 0      | 0      | 0    | 0    | 29    | 2      | 0      | 0    | 0    |
| CODEINE                     | 1     | 1      | 1      | 10   | 11   | 93    | 103    | 119    | 126  | 117  | 4     | 23     | 64     | 99   | 88   |
| CODEINE-6-GLUCURONIDE       | 103   | 85     | 83     | 81   | 74   | 14    | 9      | 0      | 0    | 0    | 87    | 77     | 30     | 0    | 0    |
| DIPHENHYDRAMINE             | 1     | 2      | 2      | 11   | 13   | 103   | 96     | 97     | 94   | 101  | 44    | 100    | 100    | 97   | 100  |
| DIPHENHYDRAMINE GLUCURONIDE | 49    | 47     | 46     | 38   | 36   | 1     | 1      | 1      | 0    | 0    | 61    | 9      | 0      | 0    | 0    |
| DOXYLAMINE                  | 2     | 2      | 2      | 6    | 7    | 36    | 35     | 39     | 38   | 39   | 7     | 29     | 38     | 40   | 40   |
| DOXYLAMINE GLUCURONIDE      | 83    | 75     | 80     | 70   | 73   | 1     | 1      | 0      | 0    | 0    | 72    | 21     | 0      | 0    | 0    |
| LORAZEPAM                   | 7     | 10     | 31     | 46   | 49   | 59    | 63     | 61     | 55   | 60   | 41    | 79     | 78     | 79   | 78   |
| LORAZEPAM GLUCURONIDE       | 50    | 44     | 19     | 1    | 2    | 2     | 2      | 2      | 2    | 2    | 47    | 5      | 2      | 2    | 2    |
| MORPHINE                    | 3     | 3      | 11     | 57   | 63   | 70    | 73     | 89     | 92   | 92   | 6     | 32     | 59     | 83   | 82   |
| MORPHINE-3-GLUCURONIDE      | 102   | 87     | 73     | 4    | 2    | 0     | 0      | 0      | 0    | 0    | 78    | 40     | 1      | 0    | 0    |
| MORPHINE-6-GLUCURONIDE      | 71    | 61     | 65     | 38   | 34   | 34    | 29     | 4      | 0    | 0    | 83    | 86     | 62     | 1    | 0    |
| OXYMORPHONE                 | 1     | 1      | 2      | 13   | 14   | 14    | 15     | 16     | 16   | 16   | 1     | 7      | 20     | 23   | 23   |
| OXYMORPHONE-3-GLUCURONIDE   | 81    | 70     | 68     | 10   | 6    | 4     | 2      | 0      | 0    | 0    | 89    | 70     | 7      | 0    | 0    |
| SCOPOLAMINE                 | 4     | 5      | 19     | 54   | 56   | 69    | 70     | 70     | 71   | 71   | 14    | 68     | 91     | 94   | 91   |
| SCOPOLAMINE GLUCURONIDE     | 96    | 87     | 69     | 0    | 0    | 1     | 1      | 1      | 1    | 0    | 79    | 27     | 0      | 0    | 0    |
| TEMAZEPAM                   | 14    | 17     | 54     | 99   | 99   | 110   | 112    | 110    | 111  | 114  | 26    | 89     | 107    | 106  | 107  |
| TEMAZEPAM GLUCURONIDE       | 131   | 116    | 81     | 0    | 0    | 0     | 0      | 0      | 0    | 0    | 69    | 35     | 0      | 0    | 0    |

**Supplementary Table S4** Analyte recovery (%) for the 11 glucuronides and their parent drug after incubation with each enzyme at 40°C for the five incubation periods.

| ANALYTE                     | 40°C  |        |        |      |      |       |        |        |      |      |       |        |        |      |      |
|-----------------------------|-------|--------|--------|------|------|-------|--------|--------|------|------|-------|--------|--------|------|------|
|                             | MIX   |        |        |      |      | B-One |        |        |      |      | BGT   |        |        |      |      |
|                             | 5 min | 10 min | 60 min | 18 h | 24 h | 5 min | 10 min | 60 min | 18 h | 24 h | 5 min | 10 min | 60 min | 18 h | 24 h |
| AMITRIPTYLINE               | 1     | 1      | 1      | 2    | 32   | 38    | 99     | 104    | 98   | 96   | 68    | 72     | 75     | 76   | 77   |
| AMITRIPTYLINE GLUCURONIDE   | 48    | 48     | 45     | 23   | 21   | 1     | 1      | 1      | 0    | 0    | 12    | 3      | 0      | 0    | 0    |
| BUPRENORPHINE               | 11    | 24     | 43     | 39   | 40   | 56    | 69     | 62     | 62   | 54   | 67    | 66     | 65     | 70   | 66   |
| BUPRENORPHINE GLUCUCONIDE   | 34    | 24     | 1      | 0    | 0    | 0     | 0      | 0      | 0    | 0    | 2     | 0      | 0      | 0    | 0    |
| CODEINE                     | 1     | 1      | 3      | 47   | 51   | 91    | 104    | 109    | 109  | 117  | 18    | 27     | 79     | 87   | 86   |
| CODEINE-6-GLUCURONIDE       | 89    | 74     | 66     | 33   | 24   | 12    | 5      | 0      | 0    | 0    | 72    | 66     | 3      | 0    | 0    |
| DIPHENHYDRAMINE             | 1     | 2      | 4      | 37   | 41   | 94    | 105    | 102    | 85   | 90   | 92    | 87     | 99     | 87   | 89   |
| DIPHENHYDRAMINE GLUCURONIDE | 45    | 46     | 41     | 14   | 10   | 1     | 1      | 1      | 0    | 0    | 14    | 4      | 0      | 0    | 0    |
| DOXYLAMINE                  | 2     | 2      | 2      | 24   | 27   | 36    | 36     | 39     | 39   | 41   | 23    | 29     | 35     | 38   | 38   |
| DOXYLAMINE GLUCURONIDE      | 79    | 79     | 75     | 46   | 39   | 1     | 1      | 0      | 0    | 0    | 31    | 13     | 1      | 0    | 0    |
| LORAZEPAM                   | 11    | 22     | 41     | 40   | 41   | 58    | 59     | 50     | 49   | 46   | 79    | 72     | 79     | 65   | 64   |
| LORAZEPAM GLUCURONIDE       | 37    | 24     | 1      | 1    | 1    | 2     | 2      | 1      | 2    | 2    | 5     | 1      | 2      | 1    | 2    |
| MORPHINE                    | 4     | 9      | 31     | 81   | 84   | 70    | 77     | 98     | 91   | 91   | 26    | 34     | 71     | 80   | 78   |
| MORPHINE-3-GLUCURONIDE      | 77    | 62     | 31     | 0    | 0    | 0     | 0      | 0      | 0    | 0    | 46    | 24     | 0      | 0    | 0    |
| MORPHINE-6-GLUCURONIDE      | 57    | 55     | 49     | 2    | 1    | 34    | 23     | 0      | 0    | 0    | 84    | 75     | 21     | 0    | 0    |
| OXYMORPHONE                 | 1     | 2      | 7      | 15   | 15   | 15    | 16     | 14     | 17   | 17   | 5     | 8      | 21     | 22   | 21   |
| OXYMORPHONE-3-GLUCURONIDE   | 66    | 61     | 33     | 0    | 0    | 4     | 1      | 0      | 0    | 0    | 73    | 55     | 0      | 0    | 0    |
| SCOPOLAMINE                 | 6     | 13     | 37     | 55   | 55   | 66    | 68     | 56     | 73   | 73   | 52    | 68     | 86     | 89   | 85   |
| SCOPOLAMINE GLUCURONIDE     | 83    | 63     | 27     | 0    | 0    | 1     | 1      | 1      | 0    | 0    | 40    | 18     | 0      | 0    | 0    |
| TEMAZEPAM                   | 21    | 39     | 96     | 100  | 94   | 111   | 113    | 121    | 112  | 113  | 76    | 91     | 99     | 104  | 101  |
| TEMAZEPAM GLUCURONIDE       | 115   | 86     | 0      | 0    | 0    | 0     | 0      | 0      | 0    | 0    | 43    | 30     | 0      | 0    | 0    |

**Supplementary Table S5** Analyte recovery (%) for the 11 glucuronides and their parent drug after incubation with each enzyme at 55°C for the five incubation periods.

[illegible]



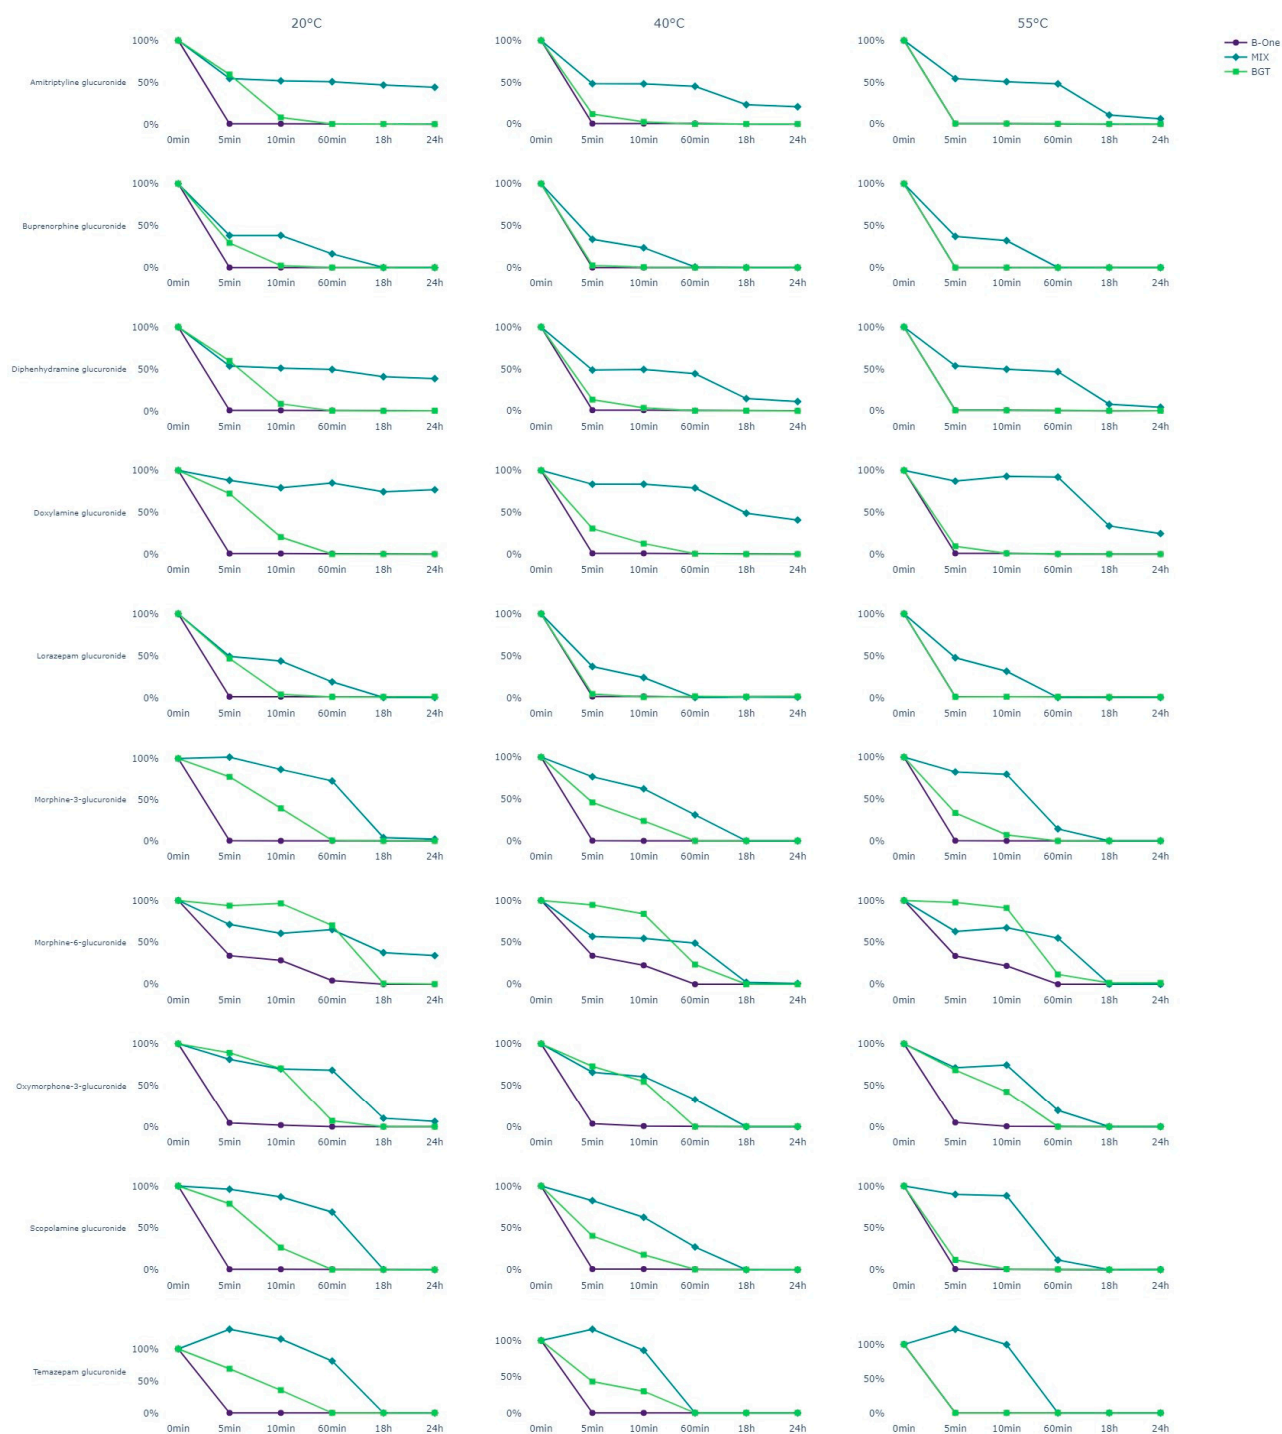

**Supplementary Figure S1** Cleavage (%) of 10 glucuronides when enzymatically hydrolyzed with either MIX, B-One or BGT at 20°C, 40°C and 55°C for 24 hours. The x-axis is in categorical order based on the five incubation periods.

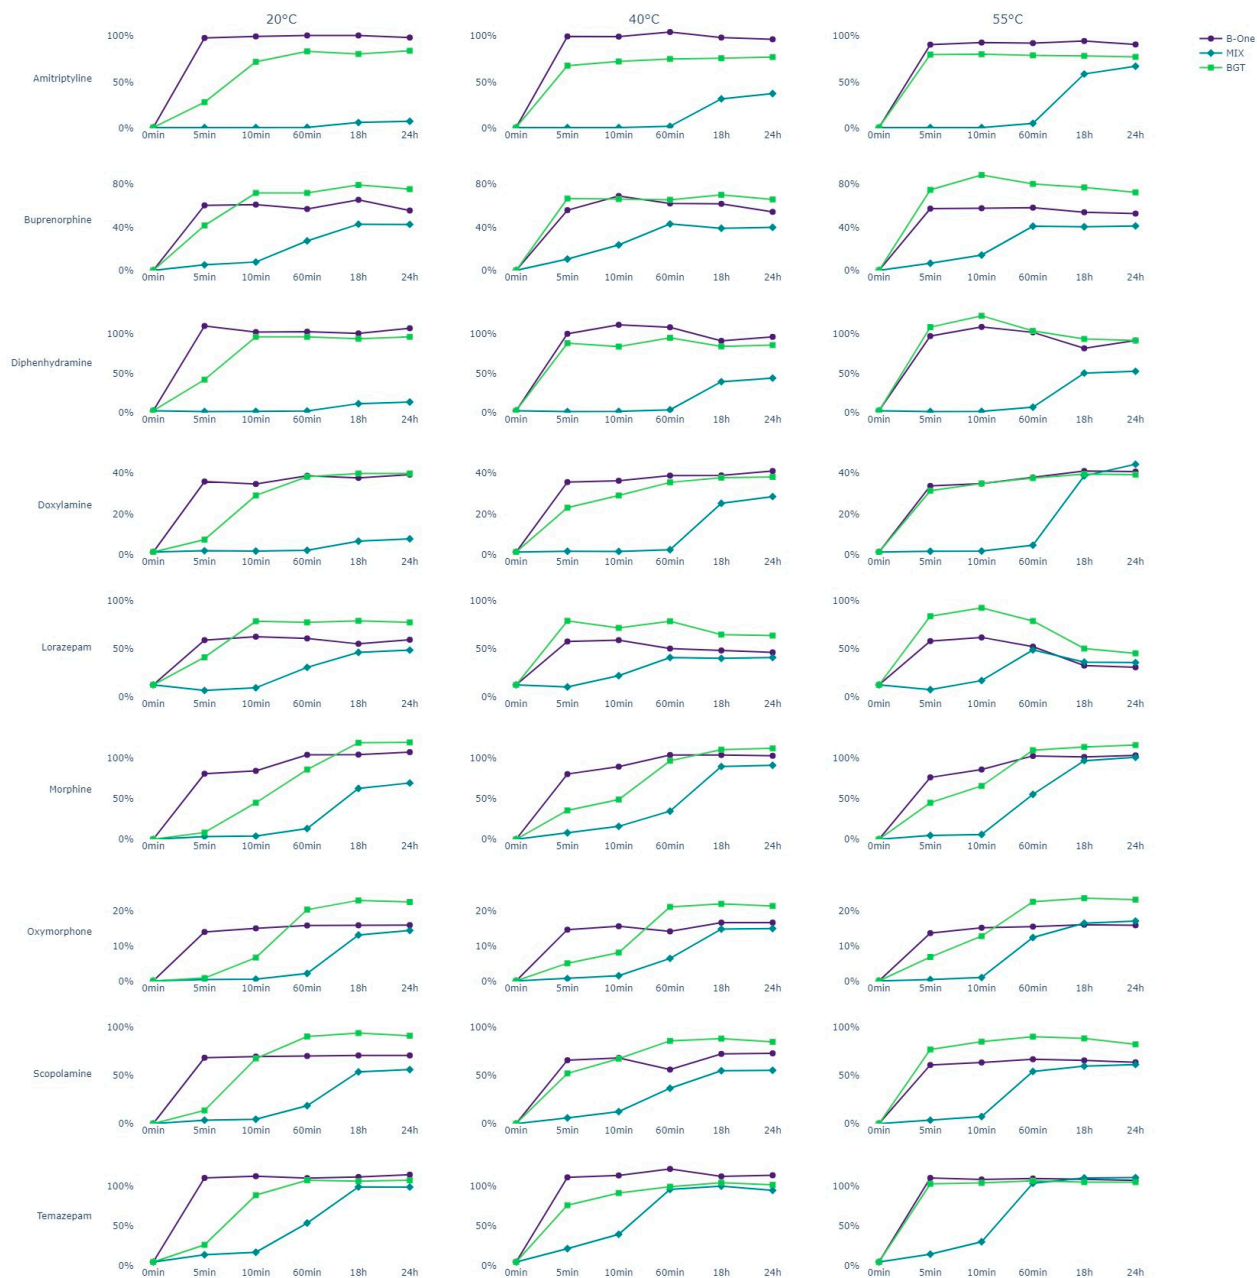

**Supplementary Figure S2** Analyte recovery (%) of 9 parent drugs when their corresponding glucuronide is enzymatically hydrolyzed with either MIX, B-One or BGT at 20°C, 40°C and 55°C for 24 hours. The x-axis is in categorical order based on the five incubation periods.
